# Supplementary material
Source: PubMed Central journal article supplement (PMC5107670)
Supplement: Supp_Fig2.pdf [file Supp_Fig2.pdf]

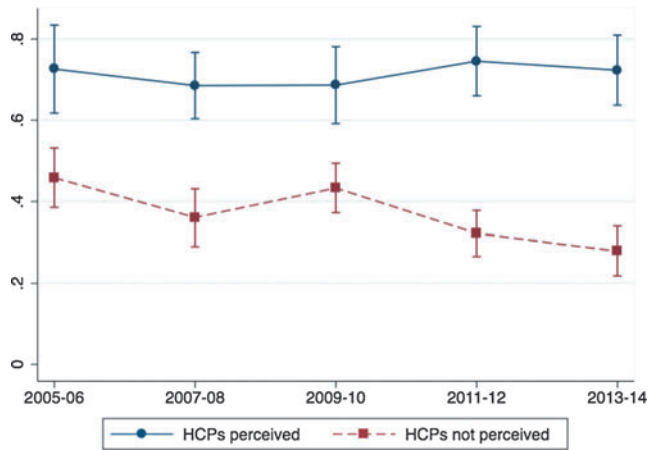

**Supplementary Figure S2. Trends of proportions of objectively obese/overweight children's parents who correctly perceived their children as overweight, stratified by parental report of healthcare professional's indication about the children's overweight status. Adjusted for objectively measured weight category (obesity or overweight), age category, sex, race and ethnicity, family income category, healthcare provider visits over past year, and insurance coverage. Error bars represent 95% confidence intervals.**
