# Supplementary material
Source: PubMed Central journal article supplement (PMC5107670)
Supplement: Supp_Tables1-3.pdf [file Supp_Tables1-3.pdf]

**Supplementary Table S1. The Relationship Between Children's Perceptions About Their Overweight Status and Several Factors; the Developed Prediction Model for Children's Perception**

|                                                                 | Odds ratio | 95% CI    | p      |
|-----------------------------------------------------------------|------------|-----------|--------|
| Year × weight category (ref: 2005–2006 × obesity)               |            |           |        |
| 2007–2008 × Obesity                                             | 1.01       | 0.65–1.59 | 0.95   |
| 2009–2010 × Obesity                                             | 0.97       | 0.68–1.39 | 0.86   |
| 2011–2012 × Obesity                                             | 0.74       | 0.47–1.15 | 0.18   |
| 2013–2014 × Obesity                                             | 0.80       | 0.54–1.20 | 0.28   |
| 2005–2006 × Overweight                                          | 0.23       | 0.13–0.38 | <0.001 |
| 2007–2008 × Overweight                                          | 0.24       | 0.14–0.41 | <0.001 |
| 2009–2010 × Overweight                                          | 0.20       | 0.11–0.36 | <0.001 |
| 2011–2012 × Overweight                                          | 0.12       | 0.08–0.19 | <0.001 |
| 2013–2014 × Overweight                                          | 0.21       | 0.13–0.36 | <0.001 |
| 2005–2006 × Normal/underweight                                  | 0.02       | 0.01–0.04 | <0.001 |
| 2007–2008 × Normal/underweight                                  | 0.03       | 0.01–0.06 | <0.001 |
| 2009–2010 × Normal/underweight                                  | 0.03       | 0.02–0.05 | <0.001 |
| 2011–2012 × Normal/underweight                                  | 0.02       | 0.01–0.03 | <0.001 |
| 2013–2014 × Normal/underweight                                  | 0.02       | 0.01–0.04 | <0.001 |
| Age category of 12–15 years (ref: 8–11 years)                   | 1.78       | 1.42–2.24 | <0.001 |
| Female sex (ref: male sex)                                      | 1.74       | 1.38–2.21 | <0.001 |
| Race and ethnicity (ref: non-Hispanic white)                    |            |           |        |
| Non-Hispanic black                                              | 0.75       | 0.58–0.98 | 0.03   |
| Mexican American                                                | 1.13       | 0.82–1.55 | 0.45   |
| Others including other Hispanics and multiracial participants   | 0.99       | 0.76–1.28 | 0.94   |
| Family income category (ref: IPR ≥4)                            |            |           |        |
| 2 ≤ IPR <4                                                      | 0.94       | 0.72–1.23 | 0.63   |
| 1 ≤ IPR <2                                                      | 1.07       | 0.79–1.44 | 0.67   |
| IPR <1                                                          | 0.97       | 0.75–1.25 | 0.81   |
| Number of healthcare provider visits over past year (ref: none) |            |           |        |
| Once                                                            | 0.77       | 0.52–1.15 | 0.21   |
| Twice or three times                                            | 0.80       | 0.54–1.20 | 0.28   |
| Four times or more                                              | 0.86       | 0.55–1.32 | 0.48   |
| No insurance coverage (ref: insurance covered)                  | 1.21       | 0.93–1.58 | 0.15   |

CI, confidence interval; IPR, income-to-poverty ratio.

**Supplementary Table S2. The Relationship Between Parental Perceptions About Their Children's Overweight Status and Several Factors; the Developed Prediction Model for Parental Perception**

|                                                                 | Odds ratio | 95% CI     | p      |
|-----------------------------------------------------------------|------------|------------|--------|
| Year × weight category (ref: 2005–2006 × obesity)               |            |            |        |
| 2007–2008 × Obesity                                             | 0.99       | 0.60–1.66  | 0.98   |
| 2009–2010 × Obesity                                             | 1.31       | 0.83–2.09  | 0.25   |
| 2011–2012 × Obesity                                             | 0.79       | 0.48–1.32  | 0.37   |
| 2013–2014 × Obesity                                             | 0.74       | 0.45–1.21  | 0.22   |
| 2005–2006 × Overweight                                          | 0.16       | 0.09–0.30  | <0.001 |
| 2007–2008 × Overweight                                          | 0.09       | 0.06–0.16  | <0.001 |
| 2009–2010 × Overweight                                          | 0.12       | 0.07–0.18  | <0.001 |
| 2011–2012 × Overweight                                          | 0.10       | 0.06–0.17  | <0.001 |
| 2013–2014 × Overweight                                          | 0.09       | 0.06–0.15  | <0.001 |
| 2005–2006 × Normal/underweight                                  | 0.009      | 0.005–0.02 | <0.001 |
| 2007–2008 × Normal/underweight                                  | 0.007      | 0.003–0.02 | <0.001 |
| 2009–2010 × Normal/underweight                                  | 0.004      | 0.002–0.01 | <0.001 |
| 2011–2012 × Normal/underweight                                  | 0.007      | 0.003–0.01 | <0.001 |
| 2013–2014 × Normal/underweight                                  | 0.004      | 0.002–0.01 | <0.001 |
| Age category of 12–15 years (ref: 8–11 years)                   | 1.04       | 0.79–1.37  | 0.79   |
| Female sex (ref: male sex)                                      | 1.55       | 1.27–1.89  | <0.001 |
| Race and ethnicity (ref: non-Hispanic white)                    |            |            |        |
| Non-Hispanic black                                              | 0.99       | 0.78–1.27  | 0.96   |
| Mexican American                                                | 1.60       | 1.20–2.13  | 0.002  |
| Others including other Hispanics and multiracial participants   | 1.36       | 1.01–1.82  | 0.04   |
| Family income category (ref: IPR ≥4)                            |            |            |        |
| 2 ≤ IPR <4                                                      | 0.85       | 0.58–1.26  | 0.42   |
| 1 ≤ IPR <2                                                      | 0.97       | 0.67–1.42  | 0.89   |
| IPR <1                                                          | 0.76       | 0.53–1.08  | 0.13   |
| Number of healthcare provider visits over past year (ref: none) |            |            |        |
| Once                                                            | 0.84       | 0.56–1.26  | 0.40   |
| Twice or three times                                            | 0.91       | 0.65–1.27  | 0.56   |
| Four times or more                                              | 1.00       | 0.70–1.43  | 0.99   |
| No insurance coverage (ref: insurance covered)                  | 0.85       | 0.62–1.16  | 0.30   |

CI, confidence interval; IPR, income-to-poverty ratio.

**Supplementary Table S3. The Relationship Between Parental Report About Being Informed of Their Children's Overweight Status by Health Professionals and Several Factors; the Developed Prediction Model for Healthcare Professional's Perception**

|                                                                 | Odds ratio | 95% CI     | p      |
|-----------------------------------------------------------------|------------|------------|--------|
| Year × weight category (ref: 2005–2006 × Obesity)               |            |            |        |
| 2007–2008 × Obesity                                             | 1.43       | 0.94–2.17  | 0.09   |
| 2009–2010 × Obesity                                             | 1.40       | 0.85–2.31  | 0.19   |
| 2011–2012 × Obesity                                             | 1.14       | 0.73–1.78  | 0.55   |
| 2013–2014 × Obesity                                             | 1.54       | 0.94–2.51  | 0.09   |
| 2005–2006 × Overweight                                          | 0.12       | 0.06–0.23  | <0.001 |
| 2007–2008 × Overweight                                          | 0.41       | 0.27–0.65  | <0.001 |
| 2009–2010 × Overweight                                          | 0.39       | 0.20–0.74  | <0.001 |
| 2011–2012 × Overweight                                          | 0.36       | 0.21–0.65  | <0.001 |
| 2013–2014 × Overweight                                          | 0.38       | 0.20–0.72  | <0.001 |
| 2005–2006 × Normal/underweight                                  | 0.02       | 0.009–0.04 | <0.001 |
| 2007–2008 × Normal/underweight                                  | 0.03       | 0.02–0.08  | <0.001 |
| 2009–2010 × Normal/underweight                                  | 0.04       | 0.02–0.07  | <0.001 |
| 2011–2012 × Normal/underweight                                  | 0.04       | 0.02–0.09  | <0.001 |
| 2013–2014 × Normal/underweight                                  | 0.05       | 0.03–0.08  | <0.001 |
| Age category of 12–15 years (ref: 8–11 years)                   | 1.52       | 1.23–1.89  | <0.001 |
| Female sex (ref: male sex)                                      | 1.04       | 0.87–1.25  | 0.66   |
| Race and ethnicity (ref: non-Hispanic white)                    |            |            |        |
| Non-Hispanic black                                              | 1.30       | 1.03–1.65  | 0.03   |
| Mexican American                                                | 1.82       | 1.40–2.36  | <0.001 |
| Others including other Hispanics and multiracial participants   | 1.90       | 1.37–2.64  | <0.001 |
| Family income category (ref: IPR ≥4)                            |            |            |        |
| 2 ≤ IPR <4                                                      | 0.71       | 0.49–1.04  | 0.08   |
| 1 ≤ IPR <2                                                      | 0.77       | 0.55–1.08  | 0.13   |
| IPR <1                                                          | 0.80       | 0.58–1.12  | 0.19   |
| Number of healthcare provider visits over past year (ref: none) |            |            |        |
| Once                                                            | 1.31       | 0.89–1.92  | 0.17   |
| Twice or three times                                            | 1.21       | 0.80–1.82  | 0.37   |
| Four times or more                                              | 1.75       | 1.24–2.46  | 0.002  |
| No insurance coverage (ref: insurance covered)                  | 0.70       | 0.51–0.95  | 0.02   |

CI, confidence interval; IPR, income-to-poverty ratio.
